# Supplementary material for: Deciphering the lung microbiota in COVID-19 patients: insights from culture analysis, FilmArray pneumonia panel, ventilation impact, and mortality trends
Source: PubMed Central journal article supplement — Sci Rep. 2024 Dec 3;14:30035. doi: 10.1038/s41598-024-81738-8 (PMC11615399; doi:10.1038/s41598-024-81738-8), 2024-12-03
Supplement: 41598_2024_81738_MOESM5_ESM.pdf [file 41598_2024_81738_MOESM5_ESM.pdf]

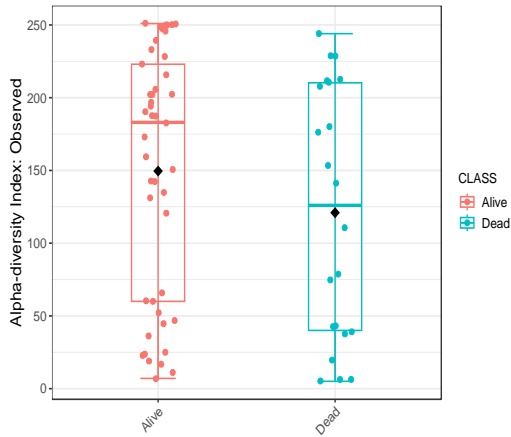

p = 0.1907

a. Mortality

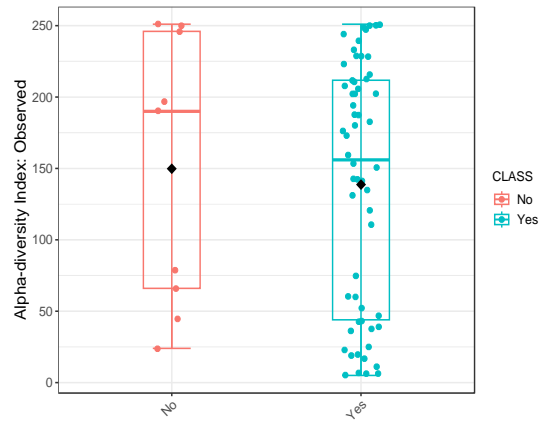

p = 0.4132

b. Patients ventilated on 7th day

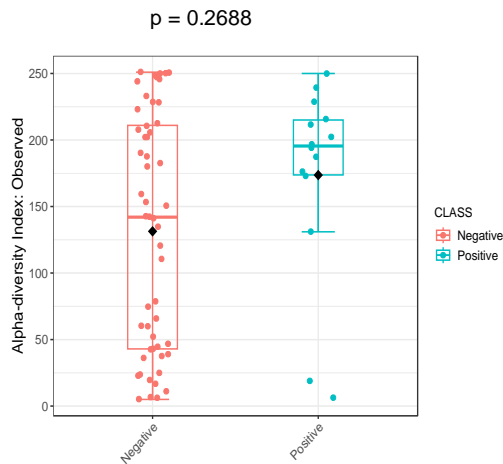

p = 0.2688

b. Cultures

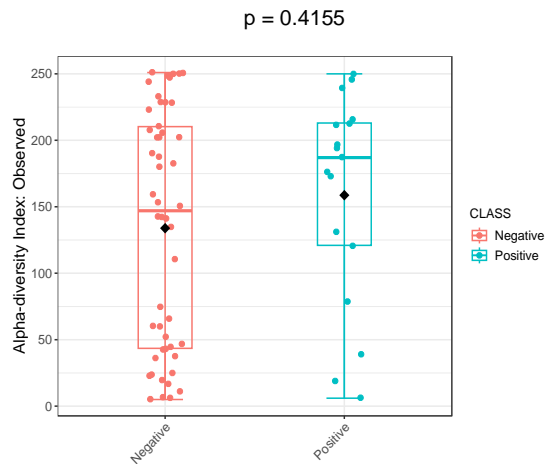

p = 0.4155

d. FA-PNEUM

**Supplementary figure 3. Alpha diversity (Richness) in each of the four variables: mortality (a), mechanical ventilation on day 7 (b), cultures (c) and AF-PNEU (d) in the 67 lung samples from the 67 patients with pneumonia due to COVID-19 admitted to Intensive Care Units in Colombia.**

There are no differences in wealth between the four variables.

Abbreviations: p: p value by Mann Whitney test; CLASS: category; FA-PNEUM: Biofire® FilmArray® Pneumonia Panel.
