# Supplementary material for: Deciphering the lung microbiota in COVID-19 patients: insights from culture analysis, FilmArray pneumonia panel, ventilation impact, and mortality trends
Source: PubMed Central journal article supplement — Sci Rep. 2024 Dec 3;14:30035. doi: 10.1038/s41598-024-81738-8 (PMC11615399; doi:10.1038/s41598-024-81738-8), 2024-12-03
Supplement: 41598_2024_81738_MOESM6_ESM.pdf [file 41598_2024_81738_MOESM6_ESM.pdf]

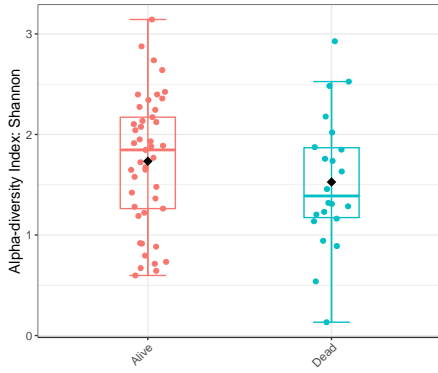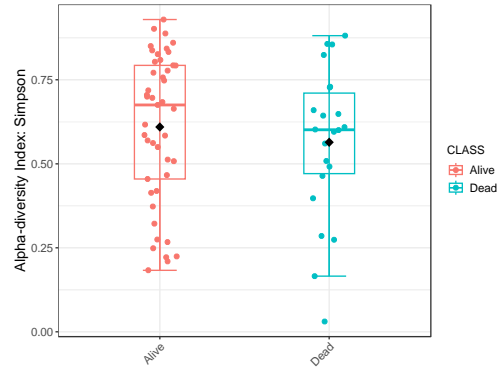

$p = 0.3033$

**a. Mortality**

$p = 0.5913$

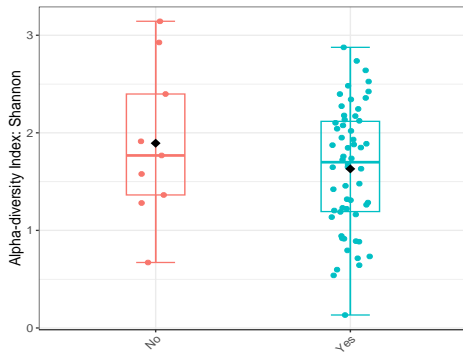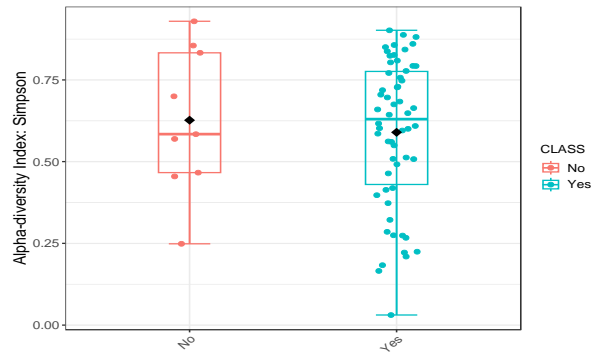

$p = 0.6391$

$p = 0.3627$

**b. Patients ventilated on 7th day**

$p = 0.47495$

$p = 0.49373$

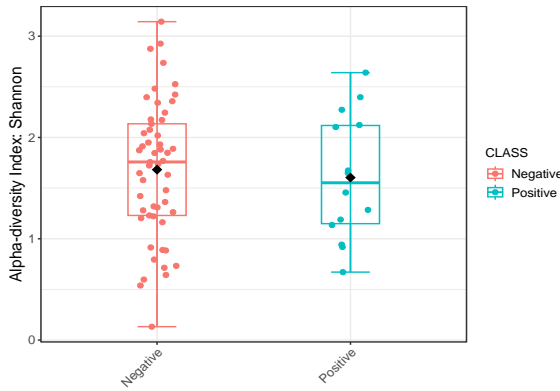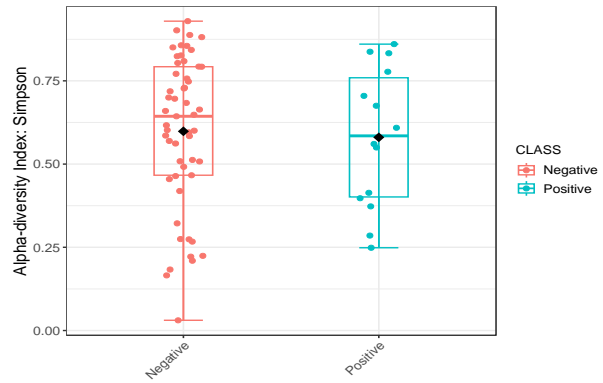

**c. Cultures**

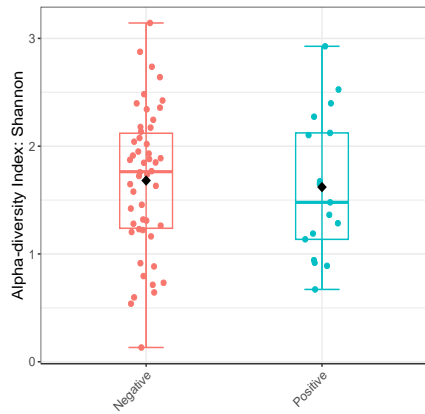

p = 0.8457

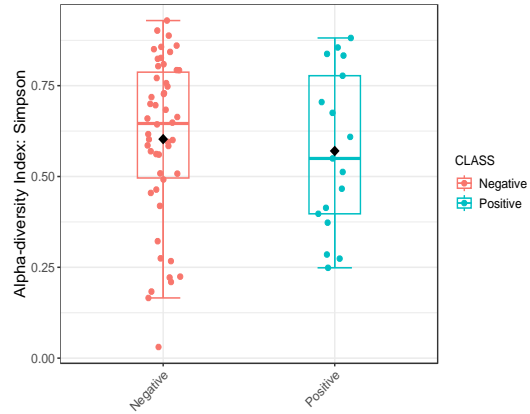

p = 0.7349

d. FA-PNEUM

**Supplementary figure 4. Alpha diversity (Shanon and Simpson Indices) in each of the four variables: mortality (a), mechanical ventilation on day 7 (b), cultures (c) and FA-PNEU (d) in the 67 lung samples of the 67 patients with severe COVID-19 pneumonia admitted to Intensive Care Units in Colombia.**

There are no differences in  $\alpha$  diversity between the four variables.

Abbreviations: p: p value by Mann Whitney test; CLASS: category; FA-PNEUM: Biofire® FilmArray® Pneumonia Panel.
