# Supplementary figures and images for: Deciphering the lung microbiota in COVID-19 patients: insights from culture analysis, FilmArray pneumonia panel, ventilation impact, and mortality trends
Source: PubMed Central journal article supplement — Sci Rep. 2024 Dec 3;14:30035. doi: 10.1038/s41598-024-81738-8 (PMC11615399; doi:10.1038/s41598-024-81738-8), 2024-12-03

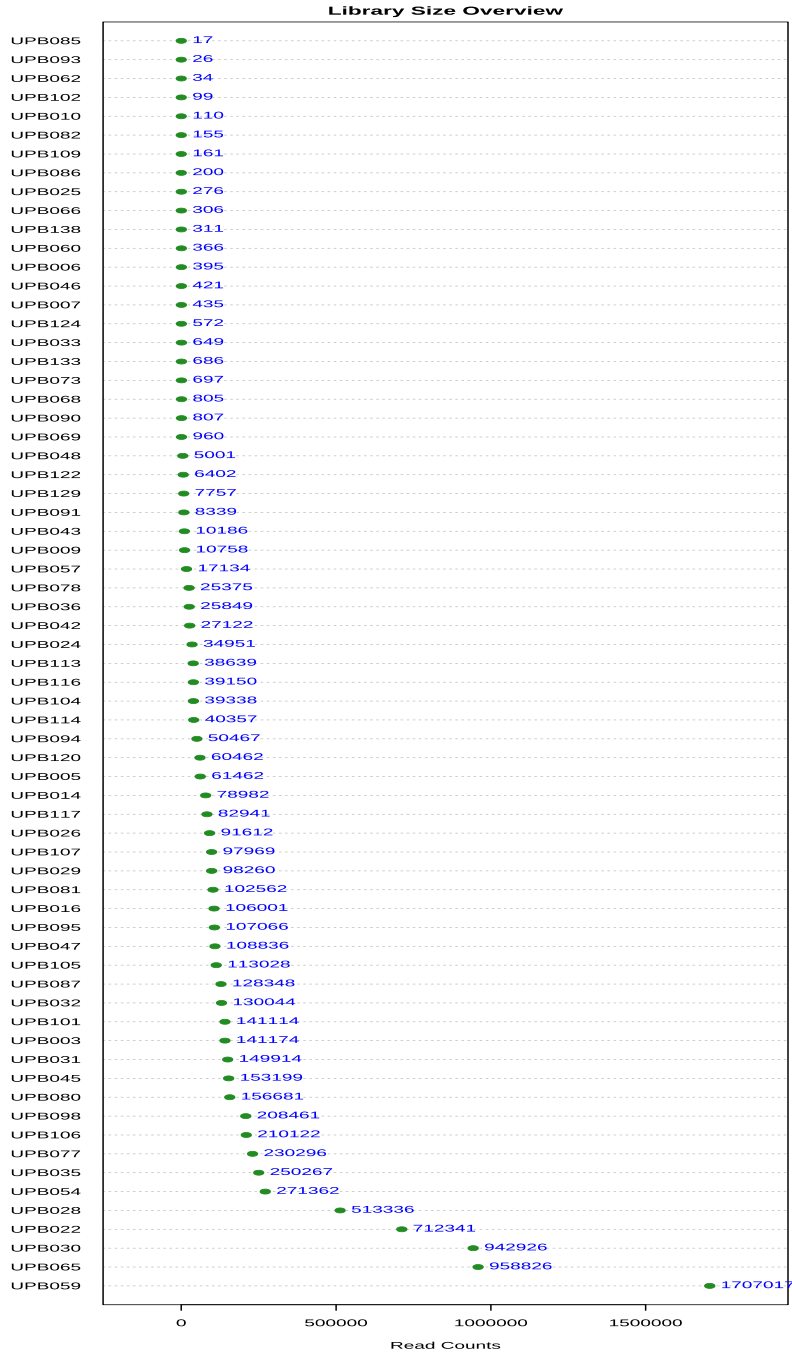

**Supplementary figure 1. Library size overview (67 samples).**

Supplement: 41598_2024_81738_MOESM1_ESM.pdf [file 41598_2024_81738_MOESM1_ESM.pdf]
